# Supplementary material for: Chemical Composition and Source Apportionment of Winter Fog in Amritsar: An Urban City of North-Western India
Source: MDPI journal article supplement (doi:10.3390/atmos13091376), 2022-08-28
Supplement: s1 [file s1]

## Supplementary Materials:

Mohammad Asif, Rekha Yadav, Aditi Sugha and Manpreet Singh Bhatti \*

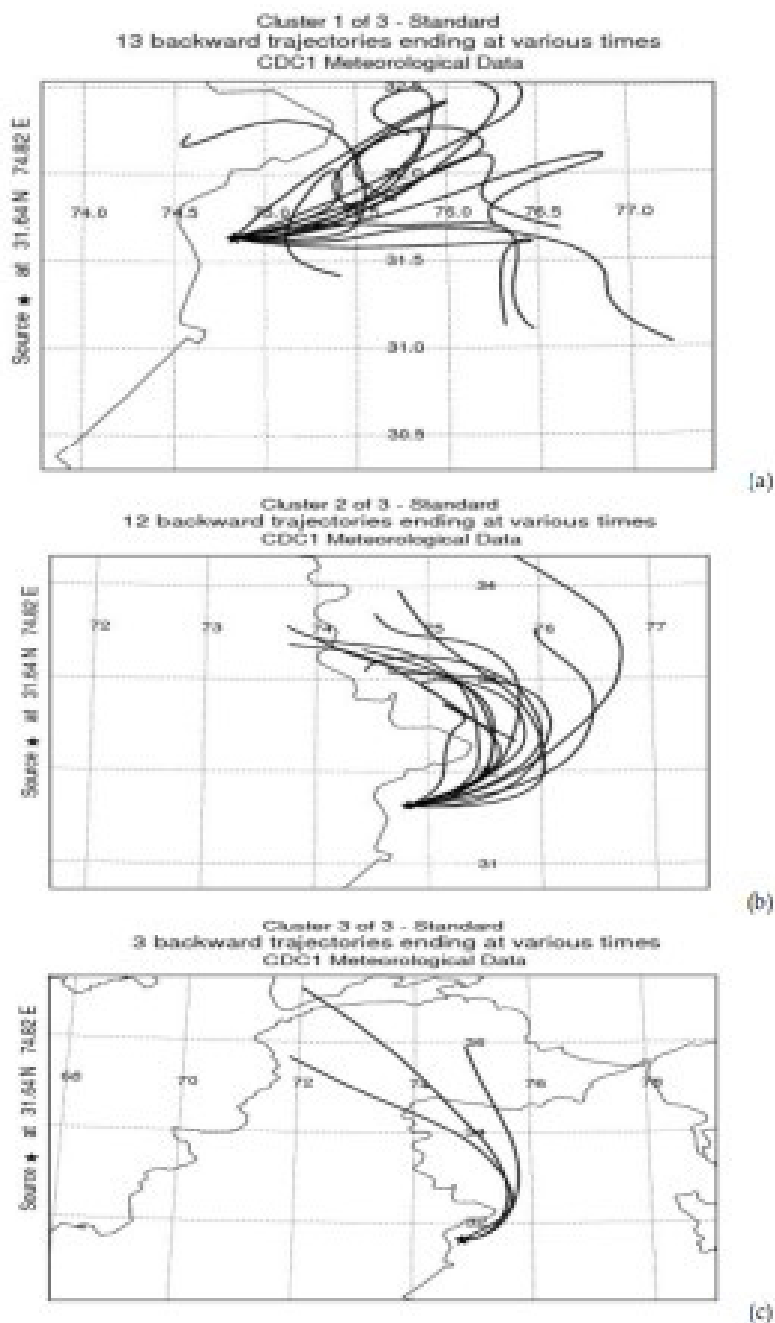

**Figure S1.** Sub-clusters of air mass back trajectories calculated at a height of 500 m above ground level for sampling days for (a) Cluster-1 (46% contribution) (b) Cluster-2 (43% contribution) and (c) Cluster-3 (11% contribution).

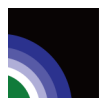**Table S1.** Summary table of chemical composition of fog water samples along with anion-cation balance.

| S.No | Sampling date | Sample volume | pH   | Cond   | Na    | K     | Ca    | Mg    | NO <sub>3</sub> | SO <sub>4</sub> | Cl    |
|------|---------------|---------------|------|--------|-------|-------|-------|-------|-----------------|-----------------|-------|
|      |               | ml            |      | μS/cm  | meq/L | meq/L | meq/L | meq/L | meq/L           | meq/L           | meq/L |
| 1    | 29-12-2020    | 149           | 7.5  | 74     | 0.16  | 0.03  | 0.38  | 0.31  | 0.13            | 0.23            | 0.11  |
| 2    | 30-12-2020    | 110           | 7.3  | 184    | 0.15  | 0.06  | 0.67  | 0.49  | 0.10            | 1.01            | 0.34  |
| 3    | 31-12-2020    | 142           | 7.5  | 100    | 0.07  | 0.03  | 0.27  | 0.17  | 0.08            | 0.74            | 0.11  |
| 4    | 01-01-2021    | 55            | 6.22 | 365    | 0.11  | 0.05  | 0.70  | 0.22  | 0.13            | 4.08            | 0.45  |
| 5    | 06-01-2021    | 93            | 5.6  | 67.6   | 0.06  | 0.06  | 0.21  | 0.12  | 0.06            | 1.79            | 0.11  |
| 6    | 07-01-2021    | 57            | 4.6  | 85     | 0.06  | 0.04  | 0.37  | 0.18  | 0.11            | 0.66            | 0.06  |
| 7    | 12-01-2021    | 148           | 4.6  | 103    | 0.06  | 0.04  | 0.38  | 0.13  | 0.07            | 0.58            | 0.06  |
| 8    | 14-01-2021    | 156           | 6    | 102    | 0.05  | 0.03  | 0.36  | 0.10  | 0.13            | 0.82            | 0.11  |
| 9    | 15-01-2021    | 243           | 6.7  | 305    | 0.06  | 0.45  | 0.50  | 0.12  | 0.58            | 2.20            | 1.58  |
| 10   | 29-01-2021    | 72            | 5.9  | 81     | 0.09  | 0.03  | 0.30  | 0.16  | 0.11            | 1.62            | 0.11  |
| 11   | 31-01-2021    | 92            | 6.4  | 91     | 0.08  | 0.04  | 0.52  | 0.14  | 0.13            | 0.91            | 0.28  |
| 12   | 01-02-2021    | 73            | 6.4  | 70     | 0.06  | 0.02  | 0.28  | 0.06  | 0.08            | 1.48            | 0.11  |
| 13   | 06-02-2021    | 55            | 6.65 | 127    | 0.10  | 0.05  | 0.71  | 0.11  | 0.14            | 3.07            | 0.23  |
| 14   | 07-02-2020    | 33            | 6.8  | 128.66 | 0.16  | 0.05  | 0.70  | 0.29  | 0.88            | 3.60            | 0.90  |
| 15   | 08-02-2021    | 85            | 6.5  | 146    | 0.07  | 0.04  | 0.51  | 0.30  | 0.09            | 1.80            | 0.36  |
| 16   | 09-02-2021    | 129           | 6.59 | 118    | 0.06  | 0.03  | 0.57  | 0.19  | 0.12            | 0.98            | 0.17  |
| 17   | 10-02-2021    | 120           | 6.69 | 125    | 0.03  | 0.02  | 0.30  | 0.07  | 0.12            | 0.84            | 0.23  |
| 18   | 11-02-2021    | 80            | 6.2  | 261    | 0.07  | 0.04  | 0.58  | 0.13  | 0.14            | 3.77            | 0.23  |
| 19   | 12-02-2021    | 121           | 6.61 | 122    | 0.05  | 0.03  | 0.22  | 0.13  | 0.08            | 0.87            | 0.11  |
| 20   | 13-02-2021    | 130           | 6.4  | 105    | 0.04  | 0.03  | 0.28  | 0.09  | 0.09            | 0.56            | 0.11  |
| 21   | 14-02-2021    | 140           | 6.18 | 204    | 0.03  | 0.02  | 0.36  | 0.07  | 0.12            | 3.83            | 0.23  |
| 22   | 15-02-2021    | 127           | 6.13 | 187    | 0.03  | 0.02  | 0.30  | 0.06  | 0.11            | 3.55            | 0.45  |
| 23   | 16-02-2021    | 137           | 6.2  | 128    | 0.04  | 0.02  | 0.30  | 0.11  | 0.10            | 0.76            | 0.34  |
| 24   | 18-02-2021    | 110           | 6.8  | 63     | 0.06  | 0.03  | 0.25  | 0.27  | 0.07            | 0.93            | 0.11  |
| 25   | 19-01-2021    | 140           | 6.76 | 72     | 0.07  | 0.03  | 0.31  | 0.26  | 0.08            | 0.87            | 0.28  |
| 26   | 20-02-2021    | 153           | 6.41 | 99     | 0.03  | 0.01  | 0.17  | 0.07  | 0.05            | 0.42            | 0.06  |
|      | Minimum       | 33            | 5    | 63     | 0.03  | 0.01  | 0.17  | 0.06  | 0.05            | 0.23            | 0.06  |
|      | Maximum       | 243           | 8    | 365    | 0.16  | 0.45  | 0.71  | 0.49  | 0.88            | 4.08            | 1.58  |
|      | Average       | 113.5         | 6.4  | 135.1  | 0.1   | 0.1   | 0.4   | 0.2   | 0.2             | 1.6             | 0.3   |

Continue.....

Continue.....

| S.No    | Pb  | Al   | Zn    | Cation Sum | Anion Sum | Balance Check | NF of Ca <sup>2+</sup> | NF of Mg <sup>2+</sup> | NF of K <sup>+</sup> |
|---------|-----|------|-------|------------|-----------|---------------|------------------------|------------------------|----------------------|
|         | ppb | ppb  | ppb   | meq/L      | meq/L     | meq/L         | meq/L                  | meq/L                  | meq/L                |
| 1       | 10  | 20   | 50    | 0.88       | 0.47      | 30.5          | 1.06                   | 0.87                   | 0.09                 |
| 2       | 10  | 10   | 100   | 1.37       | 1.45      | 2.6           | 0.60                   | 0.45                   | 0.05                 |
| 3       | 10  | 90   | 60    | 0.55       | 0.94      | 26.1          | 0.33                   | 0.20                   | 0.04                 |
| 4       | 10  | 40   | 520   | 1.07       | 4.67      | 62.6          | 0.17                   | 0.05                   | 0.01                 |
| 5       | 10  | 20   | 90    | 0.44       | 1.96      | 63.4          | 0.11                   | 0.06                   | 0.03                 |
| 6       | 10  | 20   | 70    | 0.65       | 0.83      | 11.9          | 0.48                   | 0.23                   | 0.06                 |
| 7       | 10  | 20   | 150   | 0.61       | 0.70      | 7.5           | 0.59                   | 0.21                   | 0.06                 |
| 8       | 0   | 10   | 110   | 0.54       | 1.06      | 32.8          | 0.38                   | 0.11                   | 0.03                 |
| 9       | 10  | 20   | 290   | 1.13       | 4.36      | 58.8          | 0.18                   | 0.04                   | 0.16                 |
| 10      | 10  | 50   | 50    | 0.59       | 1.84      | 51.7          | 0.17                   | 0.09                   | 0.02                 |
| 11      | 10  | 70   | 120   | 0.78       | 1.32      | 26.1          | 0.50                   | 0.14                   | 0.04                 |
| 12      | 0   | 20   | 40    | 0.42       | 1.67      | 60.1          | 0.18                   | 0.04                   | 0.01                 |
| 13      | 10  | 150  | 100   | 0.97       | 3.43      | 56.0          | 0.22                   | 0.03                   | 0.01                 |
| 14      | 20  | 120  | 70    | 1.19       | 5.38      | 63.7          | 0.16                   | 0.06                   | 0.01                 |
| 15      | 10  | 50   | 240   | 0.92       | 2.26      | 42.0          | 0.27                   | 0.16                   | 0.02                 |
| 16      | 10  | 40   | 180   | 0.85       | 1.27      | 19.9          | 0.51                   | 0.18                   | 0.03                 |
| 17      | 0   | 40   | 220   | 0.43       | 1.18      | 46.9          | 0.32                   | 0.07                   | 0.03                 |
| 18      | 10  | 120  | 750   | 0.82       | 4.13      | 67.0          | 0.15                   | 0.03                   | 0.01                 |
| 19      | 10  | 50   | 400   | 0.43       | 1.07      | 42.7          | 0.23                   | 0.13                   | 0.03                 |
| 20      | 20  | 60   | 220   | 0.44       | 0.76      | 26.6          | 0.43                   | 0.14                   | 0.04                 |
| 21      | 10  | 200  | 790   | 0.48       | 4.17      | 79.2          | 0.09                   | 0.02                   | 0.01                 |
| 22      | 10  | 130  | 500   | 0.41       | 4.11      | 81.9          | 0.08                   | 0.02                   | 0.01                 |
| 23      | 10  | 80   | 380   | 0.48       | 1.20      | 43.2          | 0.35                   | 0.13                   | 0.03                 |
| 24      | 10  | 60   | 40    | 0.61       | 1.11      | 29.3          | 0.25                   | 0.27                   | 0.03                 |
| 25      | 0   | 70   | 90    | 0.66       | 1.22      | 29.8          | 0.33                   | 0.27                   | 0.04                 |
| 26      | 0   | 20   | 50    | 0.28       | 0.52      | 29.8          | 0.36                   | 0.15                   | 0.03                 |
| Minimum | 0   | 10   | 40    | 0.28       | 0.47      | 2.6           | 0.08                   | 0.02                   | 0.01                 |
| Maximum | 20  | 200  | 790   | 1.3        | 5.3       | 81.9          | 1.06                   | 0.87                   | 0.16                 |
| Average | 8.8 | 60.8 | 218.5 | 0.7        | 2.0       | 42.0          | 0.33                   | 0.16                   | 0.04                 |

**Table S2.** Neutralization factor (NF) of different cations by the present study and their comparison with other studies related to fog, dew and rain samples.

| S.N.                            | Country       | City           | Study period           | Sample type            | No. of Samples | Neutralizing Factors |                    |                    |                  | Order of Neutralization factor                                                      | References                       |
|---------------------------------|---------------|----------------|------------------------|------------------------|----------------|----------------------|--------------------|--------------------|------------------|-------------------------------------------------------------------------------------|----------------------------------|
|                                 |               |                |                        |                        |                | NF <sub>NH4+</sub>   | NF <sub>Ca2+</sub> | NF <sub>Mg2+</sub> | NF <sub>K+</sub> |                                                                                     |                                  |
| <b>International studies</b>    |               |                |                        |                        |                |                      |                    |                    |                  |                                                                                     |                                  |
| 1                               | China         | Nanjing        | Dec. 2006 to Dec. 2007 | Fog                    | -              | 0.82                 | 0.6                | 0.05               | -                | NH <sub>4</sub> <sup>+</sup> > Ca <sup>2+</sup> > Mg <sup>2+</sup>                  | Lu <i>et al.</i> , 2010 [43]     |
| 2                               | Bangladesh    | Bhola Island   | Dec. 2014 to Jan. 2015 | Dew                    | 10             | -                    | 1.42               | 0.42               | 0.28             | Ca <sup>2+</sup> > Mg <sup>2+</sup> > K <sup>+</sup>                                | Shohel <i>et al.</i> , 2017 [28] |
| 3                               | Nepal         | Lumbani        | Dec. 2017 to Jan. 2018 | Fog                    | -              | 0.64                 | 0.59               | 0.14               | 0.07             | NH <sub>4</sub> <sup>+</sup> > Ca <sup>2+</sup> >Mg <sup>2+</sup> >K <sup>+</sup>   | Izhar <i>et al.</i> , 2019 [7]   |
| 4                               | Bangladesh    | Coastal Island | Dec. 2017 to Feb. 2018 | Fog                    | 18             | 0.33                 | 0.66               | 0.2                | 0.19             | Ca <sup>2+</sup> > NH <sub>4</sub> <sup>+</sup> > Mg <sup>2+</sup> > K <sup>+</sup> | Nahar <i>et al.</i> , 2022 [21]  |
| <b>National studies (India)</b> |               |                |                        |                        |                |                      |                    |                    |                  |                                                                                     |                                  |
|                                 | State         | City           |                        |                        |                |                      |                    |                    |                  |                                                                                     |                                  |
| 5                               | Delhi         | Delhi          | 2000 to 2003 (winter)  | Fog                    | 17             | 1.45                 | 0.45               | 0.04               | -                | NH <sub>4</sub> <sup>+</sup> > Ca <sup>2+</sup> >Mg <sup>2+</sup>                   | Ali <i>et al.</i> , 2004 [25]    |
| 6                               | Delhi         | Delhi          | Dec. 2014 to Mar. 2015 | Fog                    | 14             | 0.73                 | 0.61               | 0.07               | -                | NH <sub>4</sub> <sup>+</sup> > Ca <sup>2+</sup> >Mg <sup>2+</sup>                   | Nath and Yadav, 2018 [39]        |
| 7                               | Delhi         | Delhi          | Dec.2011 to March 2012 | Dew                    | 25             | 1.1                  | 0.55               | 0.05               | -                | NH <sub>4</sub> <sup>+</sup> > Ca <sup>2+</sup> >Mg <sup>2+</sup>                   | Yadav and Kumar, 2014 [57]       |
| 8                               | Delhi         | Delhi          | Dec.2014 to Mar. 2015  | Dew                    | 19             | 1.06                 | 1.37               | 0.1                | -                | NH <sub>4</sub> <sup>+</sup> > Ca <sup>2+</sup> >Mg <sup>2+</sup>                   | Nath and Yadav, 2018 [39]        |
| 9                               | Delhi         | Delhi          | 2010 to 2011 (winter)  | Atmospheric condensate | 50             | 2.1                  | 0.81               | 0.09               | -                | NH <sub>4</sub> <sup>+</sup> > Ca <sup>2+</sup> >Mg <sup>+</sup>                    | Kumar and Yadav, 2013 [22]       |
| 10                              | Delhi         | Delhi          | 2011 to 2013           | Rain                   | 106            | 0.17                 | 1.4                | 0.49               | 0.04             | Ca <sup>2+</sup> > Mg <sup>+</sup> > NH <sub>4</sub> <sup>+</sup> > K <sup>+</sup>  | Rao <i>et al.</i> , 2016 [56]    |
| 11                              | Punjab        | Amritsar       | Dec. 2020 to Feb. 2021 | Fog                    | 30             | -                    | 0.33               | 0.16               | 0.04             | Ca <sup>2+</sup> >Mg <sup>2+</sup> >K <sup>+</sup>                                  | <i>Present Study</i>             |
| 12                              | Uttaranchal   | Nanital        | June-Sept. 2012        | Rain                   | 55             | 0.37                 | 4.94               | 1.21               | -                | Ca <sup>2+</sup> >Mg <sup>2+</sup> > NH <sub>4</sub> <sup>+</sup>                   | Bisht <i>et al.</i> ,2017 [27]   |
| 13                              | Uttar Pradesh | Lucknow        | July 2005              | Rain                   | -              | 0.35                 | 1.36               | 0.43               | -                | Ca <sup>2+</sup> > Mg <sup>2+</sup> > NH <sub>4</sub> <sup>+</sup>                  | Singh <i>et al.</i> , 2007 [32]  |

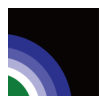**Table S3.** Enrichment factor with respect to (a) seawater and (b) crust in the present study.

|                               | <i>(a) Enrichment factor for seawater</i> |             |                                      |                                           |  | <i>(b) Enrichment factor for the crust</i> |                                     |                                             |
|-------------------------------|-------------------------------------------|-------------|--------------------------------------|-------------------------------------------|--|--------------------------------------------|-------------------------------------|---------------------------------------------|
|                               | (1)                                       | (2)         | (3)                                  | (4)                                       |  | (5)                                        | (6)                                 | (7)                                         |
| Ions                          | Sea water ratio<br>$^1(X/Na)_{sea}$       | Conc. (ppm) | Fog water ratio<br>$(X/Na)_{sample}$ | Enrichment factor (Sea)<br>$(3) \div (1)$ |  | Soil ratio<br>$^2(X/Ca)_{crust}$           | Fog water ratio<br>$(X/Ca)_{crust}$ | Enrichment factor (Crust)<br>$(6) \div (5)$ |
| SO <sub>4</sub> <sup>2-</sup> | 0.125                                     | 77.5        | 47.9                                 | 379                                       |  | 0.0188                                     | 9.61                                | 511 <sup>a</sup>                            |
| Cl <sup>-</sup>               | 1.16                                      | 9.9         | 6.04                                 | 5.2                                       |  | 0.0031                                     | 1.22                                | 395 <sup>a</sup>                            |
| K <sup>+</sup>                | 0.0218                                    | 2           | 1.20                                 | 55                                        |  | 0.504                                      | 0.24                                | 13.5 <sup>a</sup>                           |
| Mg <sup>2+</sup>              | 0.227                                     | 2           | 1.24                                 | 5.5                                       |  | 0.561                                      | 0.25                                | 0.45 <sup>b</sup>                           |
| Ca <sup>2+</sup>              | 0.0439                                    | 8.1         | 4.93                                 | 112                                       |  | 1                                          | 1                                   | 1                                           |
| Na <sup>+</sup>               | 1                                         | 1.6         | 1                                    | 1                                         |  | 0.569                                      | 0.20                                | 0.36 <sup>b</sup>                           |
| NO <sub>3</sub> <sup>-</sup>  | -                                         |             | -                                    | -                                         |  | 0.0021                                     | 1.15                                | 550 <sup>a</sup>                            |

a=anthropogenic source

b=crustal source

<sup>1</sup> keene et al., 1986 [55]<sup>2</sup> Cao et al., 2009 [29]
